# Supplementary material
Source: Springer Nature journal article supplement (https://www.springermedizin.de/resource/supplementary/12879_2013_3168_MOESM1_ESM.pdf/9446074)

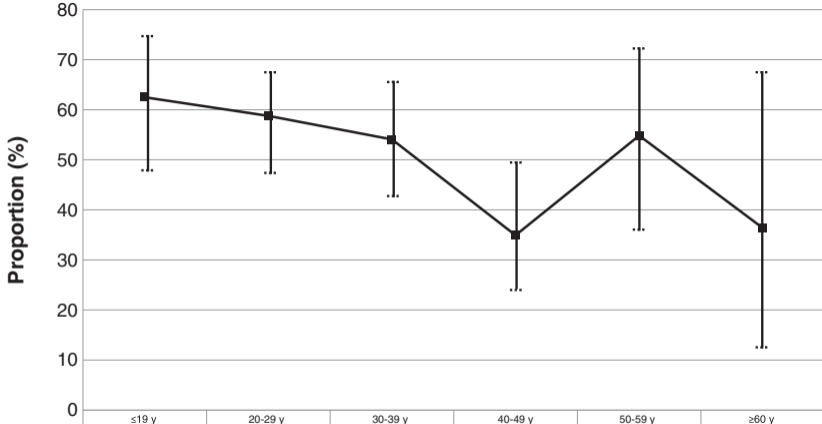

|                               | ≤19 y | 20-29 y | 30-39 y | 40-49 y | 50-59 y | ≥60 y |
|-------------------------------|-------|---------|---------|---------|---------|-------|
| Single Type (N)               | 18    | 40      | 34      | 41      | 14      | 7     |
| Multiple Type (N)             | 30    | 57      | 40      | 22      | 17      | 4     |
| ■ Proportion of MT-infections | 62.5  | 58.8    | 54.1    | 34.9    | 54.8    | 36.4  |

Supplement: MOESM1 [file 9446074]
